# Supplementary material for: Could widespread use of antiviral treatment curb the COVID-19 pandemic? A modeling study
Source: PubMed Central journal article supplement — medRxiv. 2022 Apr 4:2021.11.10.21266139. Originally published 2021 Nov 11. Preprint. [Version 3] doi: 10.1101/2021.11.10.21266139 (PMC8597888; doi:10.1101/2021.11.10.21266139), 2022-04-04
Supplement: NIHPP2021.11.10.21266139v1-supplement-1.pdf [file NIHPP2021.11.10.21266139v1-supplement-1.pdf]

## Supplemental Information

Table S1: Parameters used in the model.

| Parameter                                                                   | Distribution (mean, SD) | Reference    |
|-----------------------------------------------------------------------------|-------------------------|--------------|
| Latent period                                                               | lognormal(4.5, 1.5)     | [14, 35]     |
| Infectious period for asymptomatic and mild cases                           | lognormal(8, 2)         | [14, 36]     |
| Duration of presymptomatic period                                           | lognormal(1.1, 0.9)     | [14, 37]     |
| Length of time from symptom onset to hospitalization                        | lognormal(6.6, 4.9)     | [14, 37, 38] |
| Length of time from hospitalization to critically ill                       | lognormal(1.5, 1)       | [14, 38, 39] |
| Length of time from critically ill to death                                 | lognormal(10.7, 4.8)    | [14, 40]     |
| Time from onset of symptoms to recovery for severe and critically ill cases | lognormal(18.1, 6.3)    | [14, 40]     |
| Age-stratified mortality rates                                              | varied by age           | [14, 41, 42] |
| Age-stratified probability of developing symptoms                           | Table S2                | [14, 40, 43] |
| Fraction of symptomatic infections <15 year old                             | 0.25                    | [44]         |
| Fraction of symptomatic infections ≥15 year old                             | 0.6                     | [31, 45, 46] |
| Vaccine efficacy against infection, $VE_{SUS}$                              | 59.6                    | [34]         |
| Vaccine efficacy against symptomatic infection, $VE_{DIS}$                  | 67.5                    | [34]         |
| Vaccine efficacy against Hospitalization, $VE_{HOSP}$                       | 87.65                   | [34]         |
| Antiviral effect, AVE                                                       | 25, 50, 75, 100         | assumed      |
| Antiviral effect on hospitalization, $AV_H$ ,                               | 50 or 80                | [7, 10]      |

Table S2: Age-specific parameters for disease progression.

| Parameter                       | 0-9     | 10-19   | 20-29   | 30-39   | 40-49   | 50-59   | 60-69   | 70-79   | 80-89   | 90+    |
|---------------------------------|---------|---------|---------|---------|---------|---------|---------|---------|---------|--------|
| Probability of severe disease   | 0.0005  | 0.00165 | 0.0072  | 0.0208  | 0.0343  | 0.0765  | 0.1328  | 0.20655 | 0.2457  | 0.2457 |
| Probability of critical disease | 0.00003 | 0.00008 | 0.00036 | 0.00104 | 0.00216 | 0.00933 | 0.03639 | 0.08923 | 0.1742  | 0.1742 |
| Probability of death            | 0.00002 | 0.00002 | 0.0001  | 0.00032 | 0.00098 | 0.00265 | 0.00766 | 0.02439 | 0.08292 | 0.1619 |

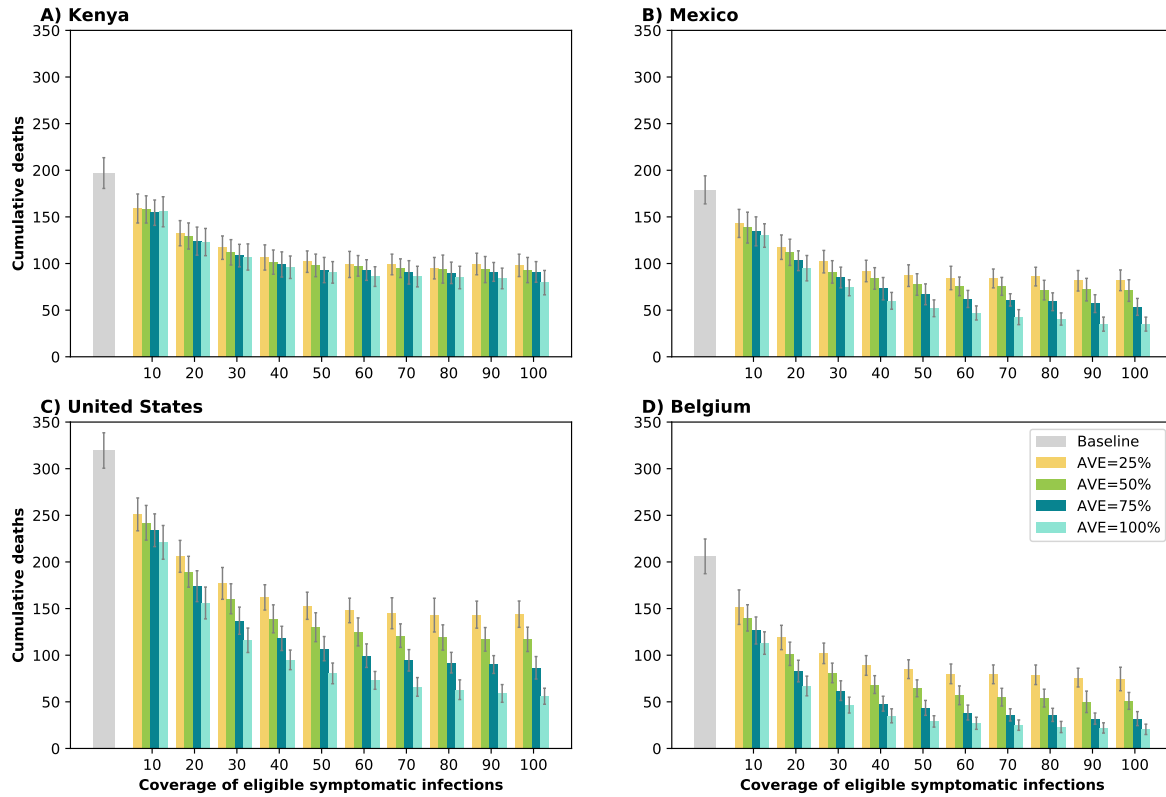

Figure S1: Cumulative deaths over next 6 months for A) Kenya, B) Mexico, C) United States and D) Belgium. For each country, we considered four possible values of AVE (25, 50, 75 or 100% reduction in viral load) and covering 10-100% of eligible symptomatic individuals within the first 5 days of symptoms. Gray bars represent baseline cumulative deaths in absence of antiviral treatment.

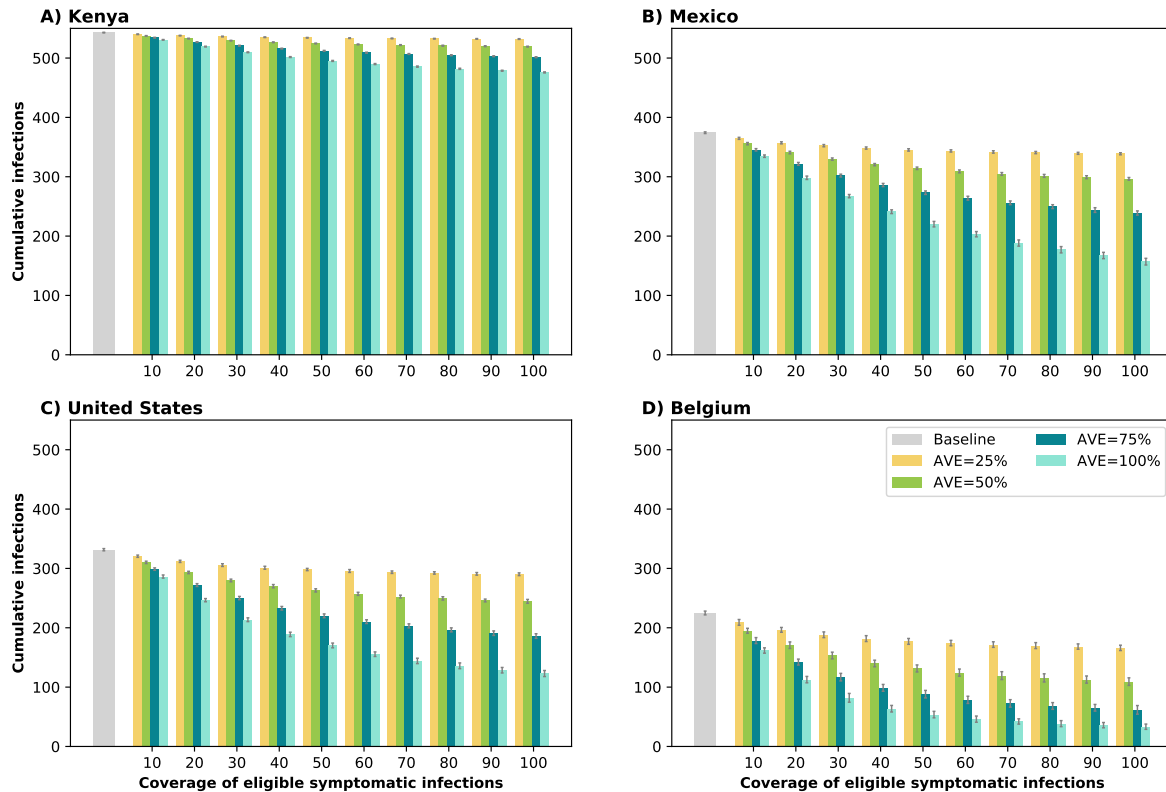

Figure S2: Cumulative infections over next 6 months for A) Kenya, B) Mexico, C) United States and D) Belgium. For each country, we considered four possible values of AVE (25, 50, 75 or 100% reduction in viral load) and covering 10-100% of eligible symptomatic individuals within the first 5 days of symptoms. Gray bars represent baseline cumulative infections in absence of antiviral treatment.

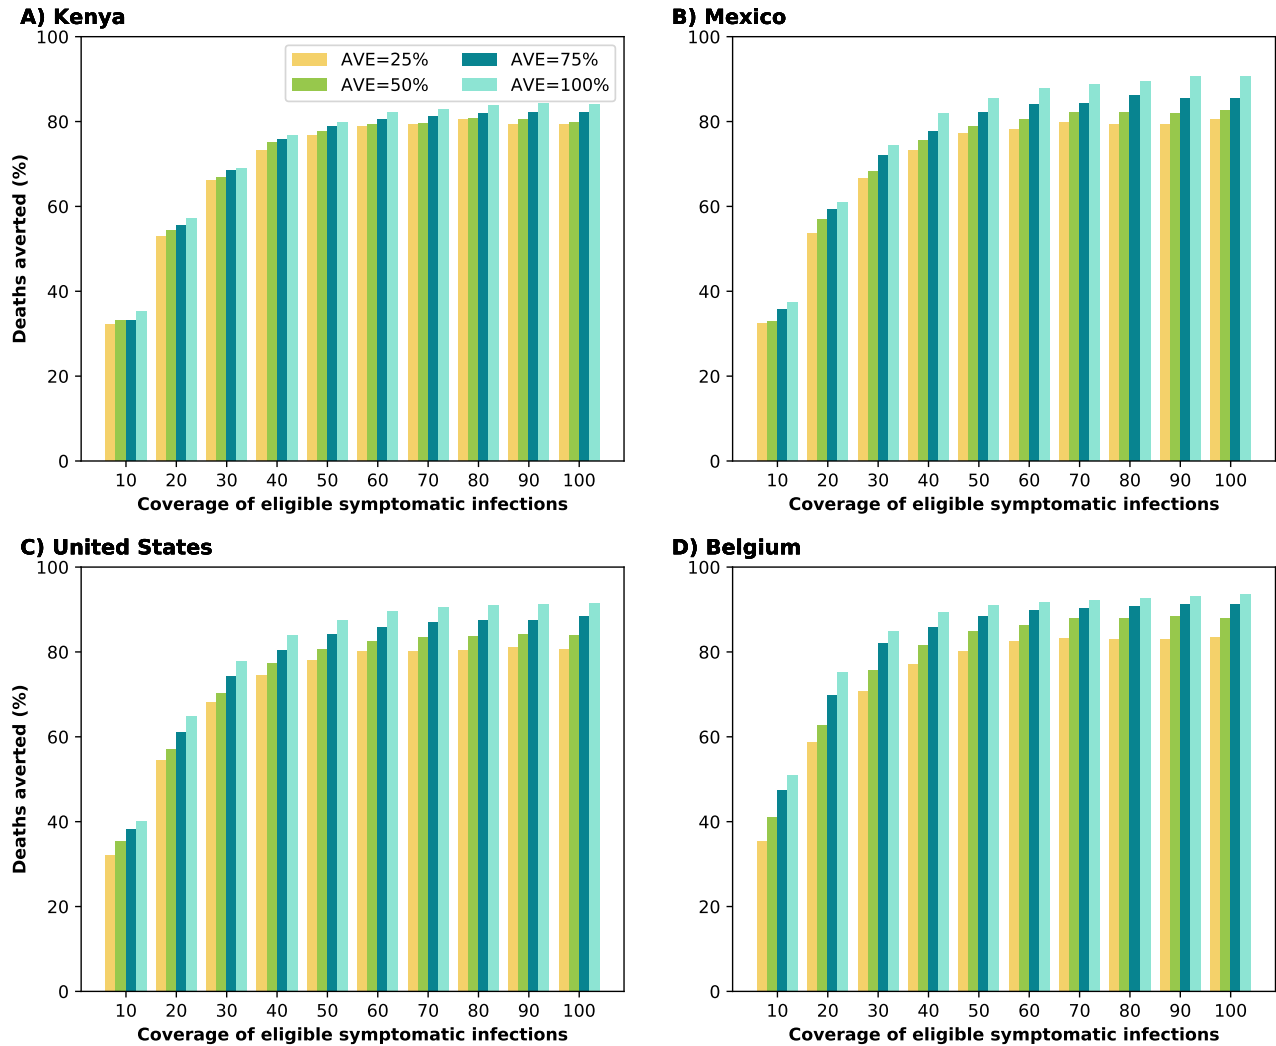

Figure S3: Percentage of deaths averted (compared to a baseline of no antiviral treatment) for A) Kenya, B) Mexico, C) United States and D) Belgium assuming antiviral treatment would reduce hospitalizations by 80%. For each country, we considered four possible values of AVE (25, 50, 75 or 100% reduction in viral load) and covering 10-100% of eligible symptomatic individuals within the first 5 days of symptoms.

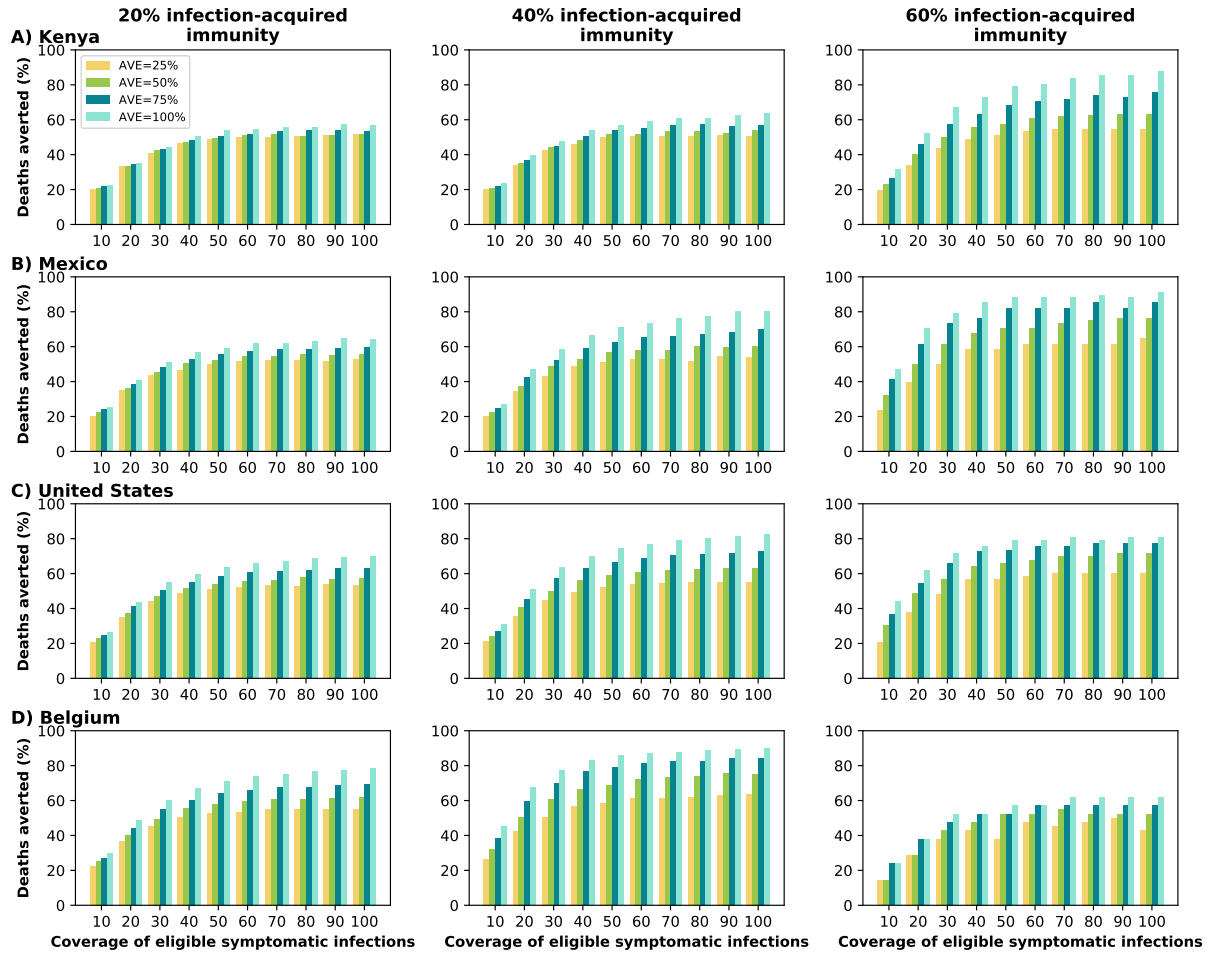

Figure S4: Proportion of deaths averted for A) Kenya, B) Mexico, C) United States and D) Belgium assuming 20 (left), 40 (middle) or 60% (right) of the population has been previously infected and is currently immune. For each country, we considered four possible values of AVE (25, 50, 75 or 100% reduction in viral load) and covering 10-100% of eligible symptomatic individuals within the first 5 days of symptoms. Gray bars represent baseline cumulative deaths in absence of antiviral treatment.

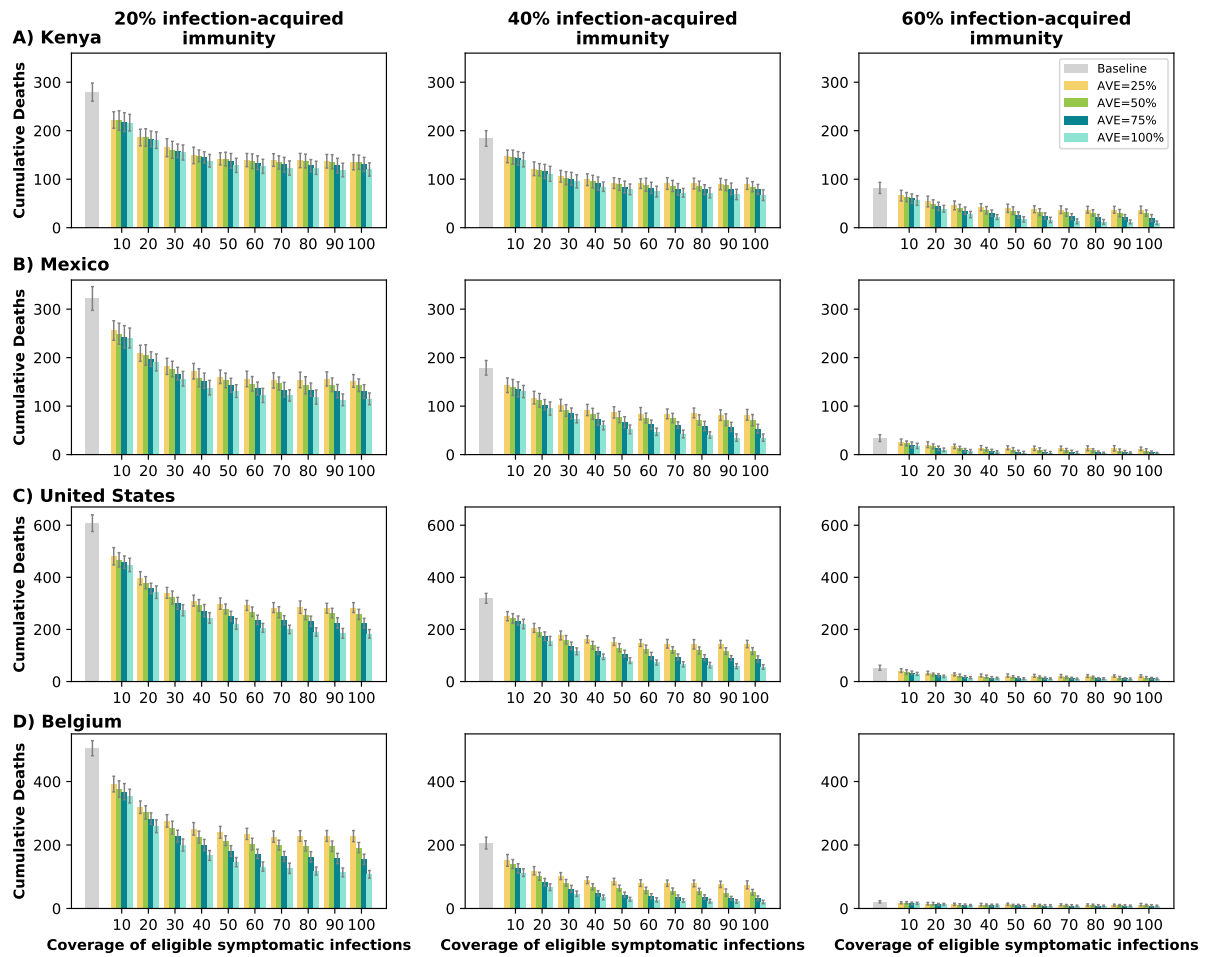

Figure S5: Cumulative deaths for A) Kenya, B) Mexico, C) United States and D) Belgium assuming 20 (left), 40 (middle) or 60% (right) of the population has been previously infected and is currently immune. For each country, we considered four possible values of AVE (25, 50, 75 or 100% reduction in viral load) and covering 10-100% of eligible symptomatic individuals within the first 5 days of symptoms. Gray bars represent baseline cumulative deaths in absence of antiviral treatment.

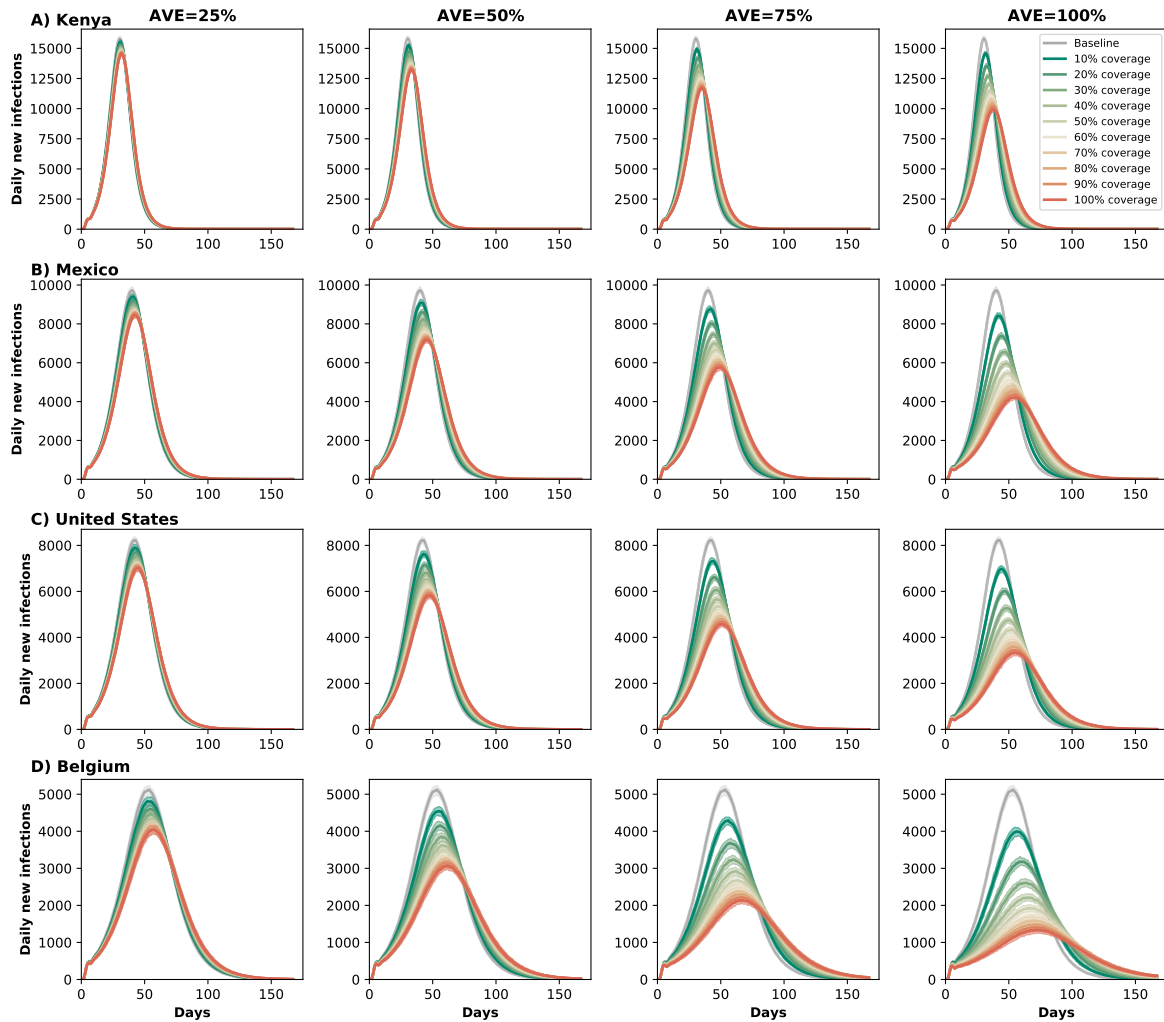

Figure S6: Daily new infections assuming no antiviral treatment (Baseline) or assuming coverage of 10-100% of eligible symptomatic individuals in A) Kenya, B) Mexico, C) United States and D) Belgium assuming 20% of the population has been previously infected and is now recovered. For each country, each column represents a different value of AVE (25, 50, 75 or 100% reduction in viral load).

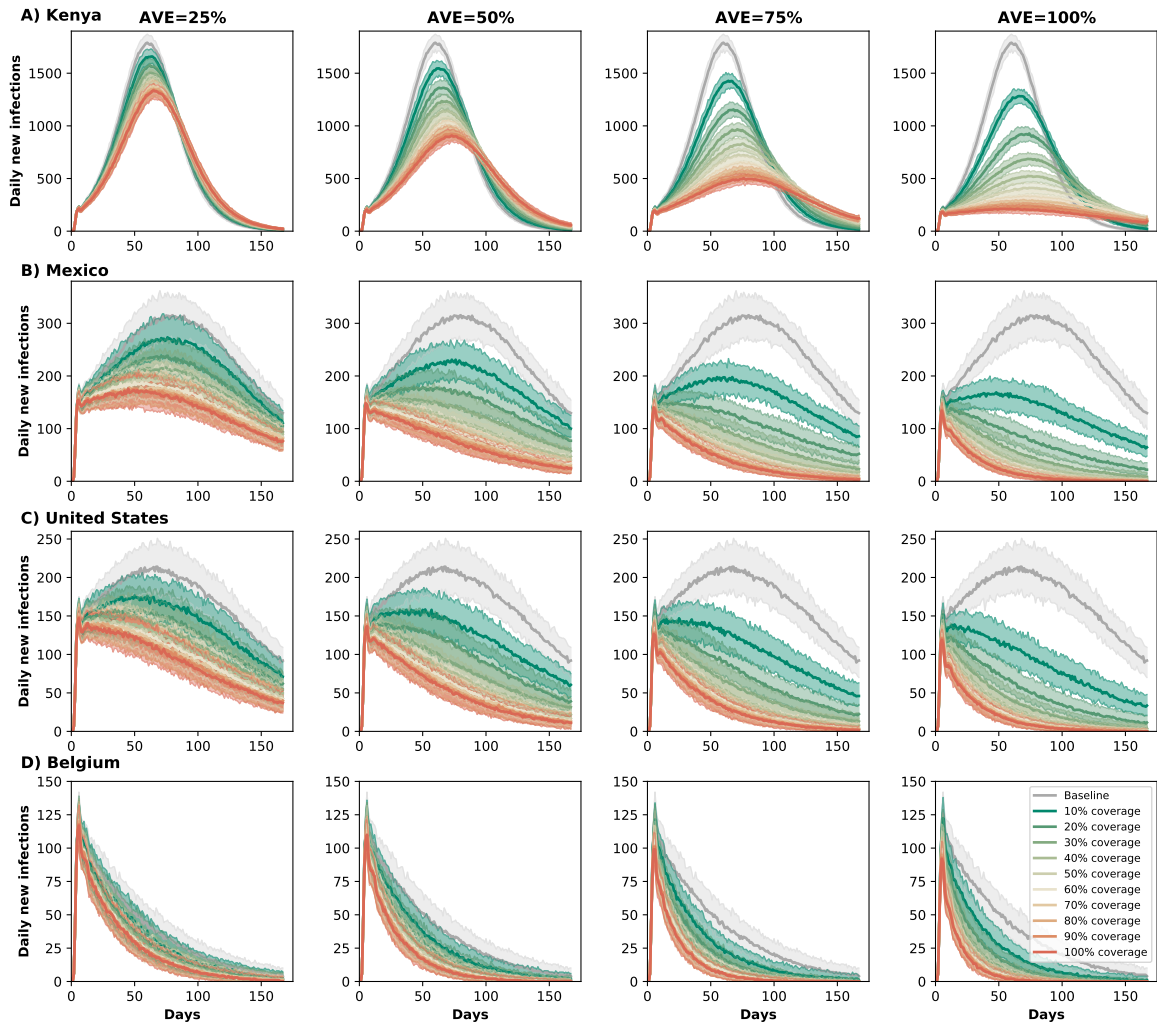

Figure S7: Daily new infections assuming no antiviral treatment (Baseline) or assuming coverage of 10-100% of eligible symptomatic individuals in A) Kenya, B) Mexico, C) United States and D) Belgium assuming 60% of the population has been previously infected and is now recovered. For each country, each column represents a different value of AVE (25, 50, 75 or 100% reduction in viral load).



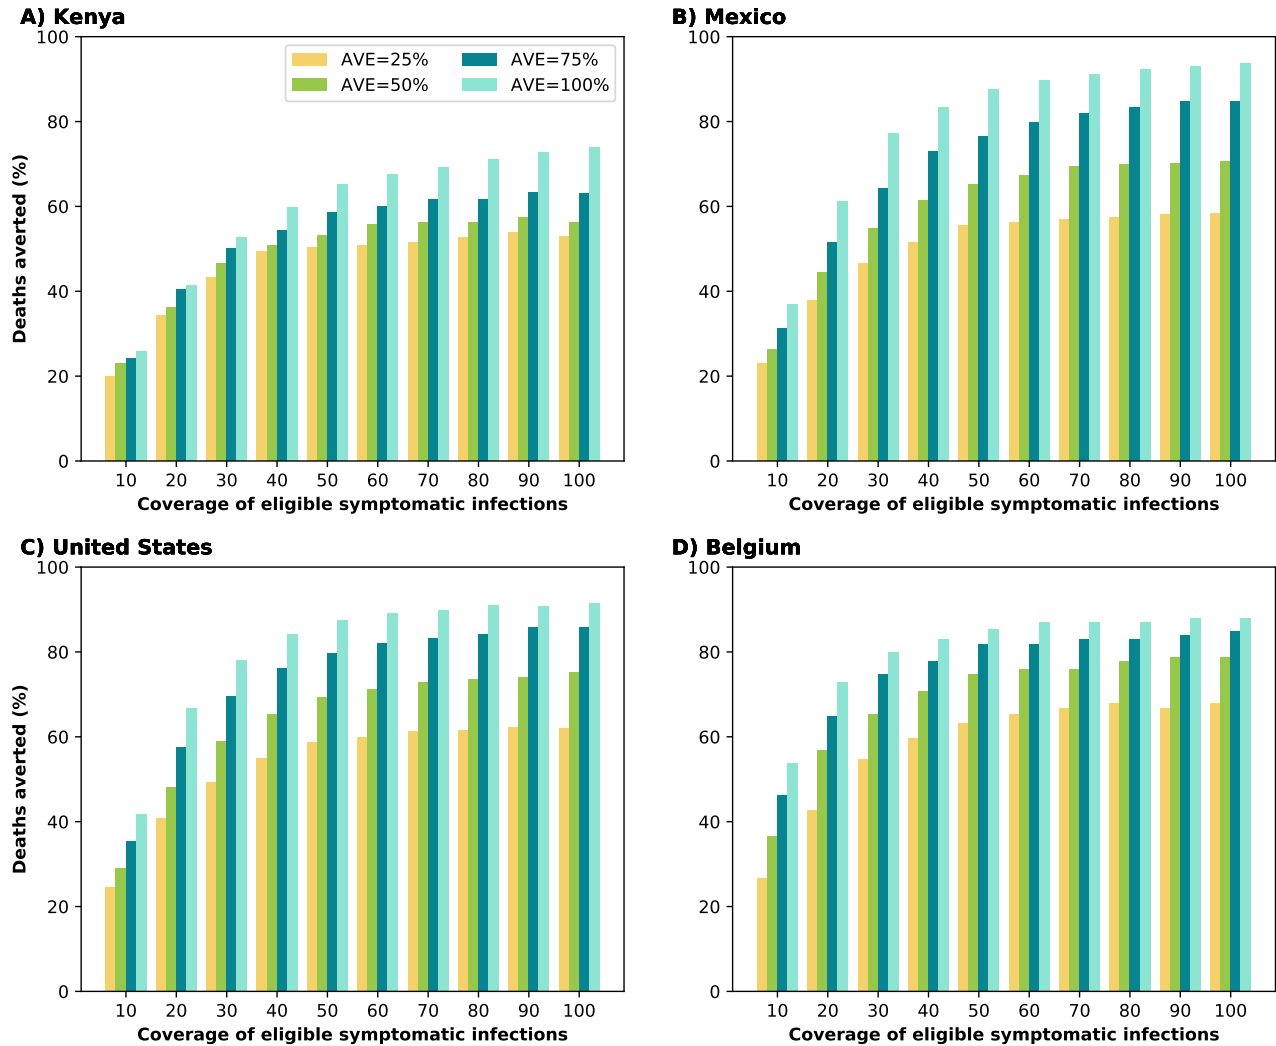

Figure S8: Percentage of deaths averted (compared to a baseline of no antiviral treatment) for A) Kenya, B) Mexico, C) United States and D) Belgium assuming asymptomatic infections are 50% less infectious. For each country, we considered four possible values of AVE (25, 50, 75 or 100% reduction in viral load) and covering 10-100% of eligible symptomatic individuals within the first 5 days of symptoms.
